# Supplementary material for: Collision tumor of the esophagus: a report of five cases
Source: PubMed Central journal article supplement — Chin Med J (Engl). 2020 Aug 13;133(19):2386–8. doi: 10.1097/CM9.0000000000000982 (PMC7546876; doi:10.1097/cm9.0000000000000982), 2020-08-13
Supplement: cm9-133-2386-s001.pdf [file cm9-133-2386-s001.pdf]

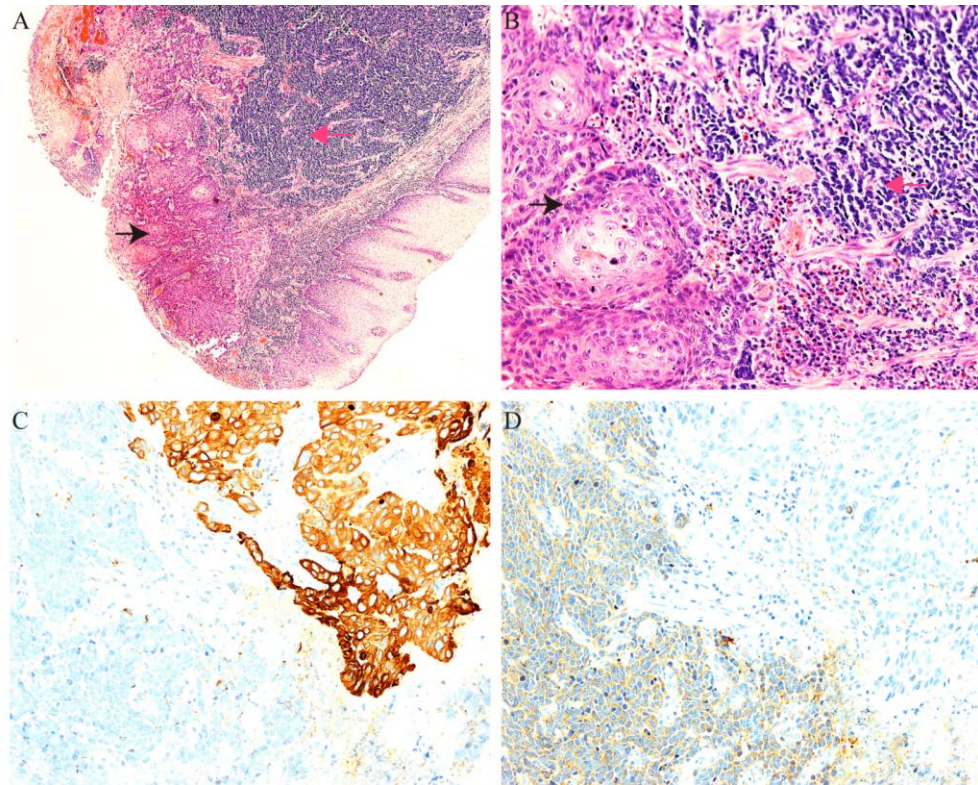

**Supplementary Figure 1:** Tumor histology and immunohistochemical staining of a representative collision tumor consisting of a squamous cell carcinoma (black arrow) and small cell carcinoma (red arrow) (A, hematoxylin-eosin staining, original magnification  $\times 40$ ). (B) Collision tumor consisting of a squamous cell carcinoma (black arrow) and small cell carcinoma (red arrow) (hematoxylin-eosin staining, original magnification  $\times 100$ ). (C) Immunohistochemical staining for Cytokeratin 34 $\beta$ E12 showing strong, cytoplasmic positivity in the squamous cell carcinoma cells (original magnification  $\times 100$ ). (D) Positive staining for synaptophysin in the small cell carcinoma cells (original magnification  $\times 100$ ).
